# Table of Contents

## FEATURES

*Approaches to Biology Teaching and Learning*  
**Learning to See Inequity in Science**  
 Kimberly D. Tanner .....265–270

*From the National Science Foundation*  
**Transforming Undergraduate Biology Education for All Students: An Action Plan for the Twenty-First Century**  
 Terry Woodin, Diane Smith, and Deborah Allen .....271–273

*Current Insights*  
**Recent Research in Science Teaching and Learning**  
 Erin Dolan .....274–275

*Educator Highlight*  
**Kathleen Nolan**  
 Interviewed by Laura L. Mays Hoopes .....276–277

## ESSAYS

**Non-STEM Undergraduates Become Enthusiastic Phage-Hunters**  
 Steven M. Caruso, James Sandoz, and Jessica Kelsey .....278–282

**Linking Assessment Questions to a Research Article to Stimulate Self-directed Learning and Develop High-order Cognitive Skills in an Undergraduate Module of Molecular Genetics**  
 Jinlu Wu .....283–290

## ARTICLES

**From Genes to Proteins to Behavior: A Laboratory Project That Enhances Student Understanding in Cell and Molecular Biology**  
 Benjamin D. Aronson and Linda A. Silveira .....291–308

**Articulating Scientific Reasoning Improves Student Learning in an Undergraduate Anatomy and Physiology Course**  
 Johanna Krontiris-Litowitz .....309–315

**A Laboratory-intensive Course on RNA Interference and Model Organisms**  
 Joanna A. Miller, D. Scott Witherow, and Susan Carson .....316–325

**Effectiveness of a Cloning and Sequencing Exercise on Student Learning with Subsequent Publication in the National Center for Biotechnology Information GenBank**  
 Joann M. Lau and David L. Robinson .....326–337

**Using a Replica of Leeuwenhoek’s Microscope to Teach the History of Science and to Motivate Students to Discover the Vision and the Contributions of the First Microscopists**  
 Lenira M.N. Sepel, Elgion L.S. Loreto, and João B.T. Rocha .....338–343

### *On the Cover*

Cover shows representative qualitative student results from a lab course on RNA interference (RNAi) at North Carolina State University. RNAi was used to silence expression of three genes in different systems by different methods: the *su* gene (magnesium chelatase, required for chlorophyll biosynthesis) in the tobacco plant *Nicotiana benthamiana*, by viral bombardment; a muscle-specific GFP transgene in the nematode *Caenorhabditis elegans*, by bacterial feeding; and a constitutively expressed, virally encoded GFP gene in cultured, CMV-infected human embryonic kidney HEK293 cells, by transfection with a plasmid producing a short hairpin RNA. Panels on the left are controls using nontargeting RNAs; panels on the right show the results of specific RNAi knockdown of the targeted genes. See article by Miller et al., p. 316.
